# Supplementary material for: Strain-dependent electronic, magnetic, and optical properties of a van der Waals CrI3/VI3 heterostructure: a first principles study
Source: Royal Society of Chemistry journal article supplement (doi:10.1039/d5cp00648a), 2025-01-01
Supplement: d5cp00648a1.pdf [file d5cp00648a1.pdf]

## Strain dependent magnetic, electronic, and optical properties of CrI<sub>3</sub>/VI<sub>3</sub> heterostructure: A first principles study

### Supplementary Information

Fazle Subhan<sup>1</sup>, Luqman Ali<sup>2</sup>, Nasir Shehzad<sup>3</sup>, Yanguang Zhou<sup>\*,4</sup> Zhenzhen Qin<sup>\*,5</sup> and Guangzhao Qin<sup>\*,1,6,7</sup>

1. *State Key Laboratory of Advanced Design and Manufacturing for Vehicle Body, College of Mechanical and Vehicle Engineering, Hunan University, Changsha 410082, P. R. China*
2. *Department of Pharmacology, University of Virginia, 22903, Charlottesville, VA, USA*
3. *Hunan Provincial Key Laboratory of High-Energy Scale Physics and Applications, School of Physics and Electronics, Hunan University, Changsha 410082, PR China*
4. *Department of Mechanical and Aerospace Engineering, The Hong Kong University of Science and Technology, Clear Water Bay, Kowloon, Hong Kong SAR*
5. *International Laboratory for Quantum Functional Materials of Henan, and School of Physics and Microelectronics, Zhengzhou University, Zhengzhou 450001, P. R. China*
6. *Research Institute of Hunan University in Chongqing, Chongqing 401133, China*
7. *Greater Bay Area Institute for Innovation, Hunan University, Guangzhou 511300, Guangdong Province, China*

Correspondence: [maeygzhou@ust.hk](mailto:maeygzhou@ust.hk) (Y. Z), [qzz@zzu.edu.cn](mailto:qzz@zzu.edu.cn) (Z. Q), [gzqin@hnu.edu.cn](mailto:gzqin@hnu.edu.cn) (G. Q);

Interestingly, the projected band structure for the CrI<sub>3</sub>/VI<sub>3</sub> heterostructure shows that the upper layer (VI<sub>3</sub>) originates the conduction band minimum (CBM), while the lower layer (CrI<sub>3</sub>) originates the valence band maximum (VBM) respectively. This property of a heterostructure results in a type-II band alignment.

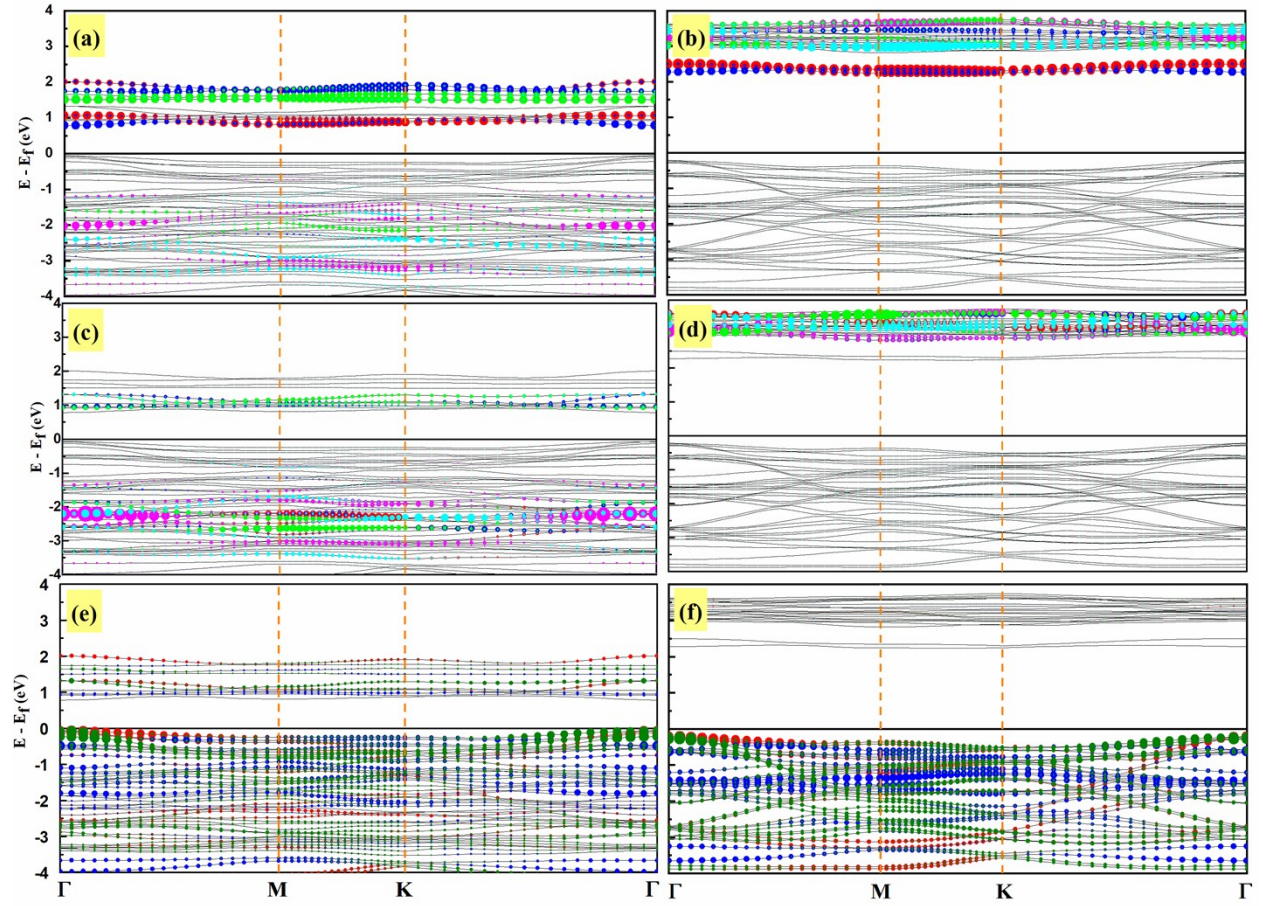

**Figure SI-1 (1%T):** Projected band structures of  $\text{CrI}_3/\text{VI}_3$  heterostructure of (a-b) V, (c-d) Cr and (d-e) I atoms respectively. The first column is for majority spin while the second column shows the minority spin of the  $\text{CrI}_3/\text{VI}_3$  heterostructure respectively.

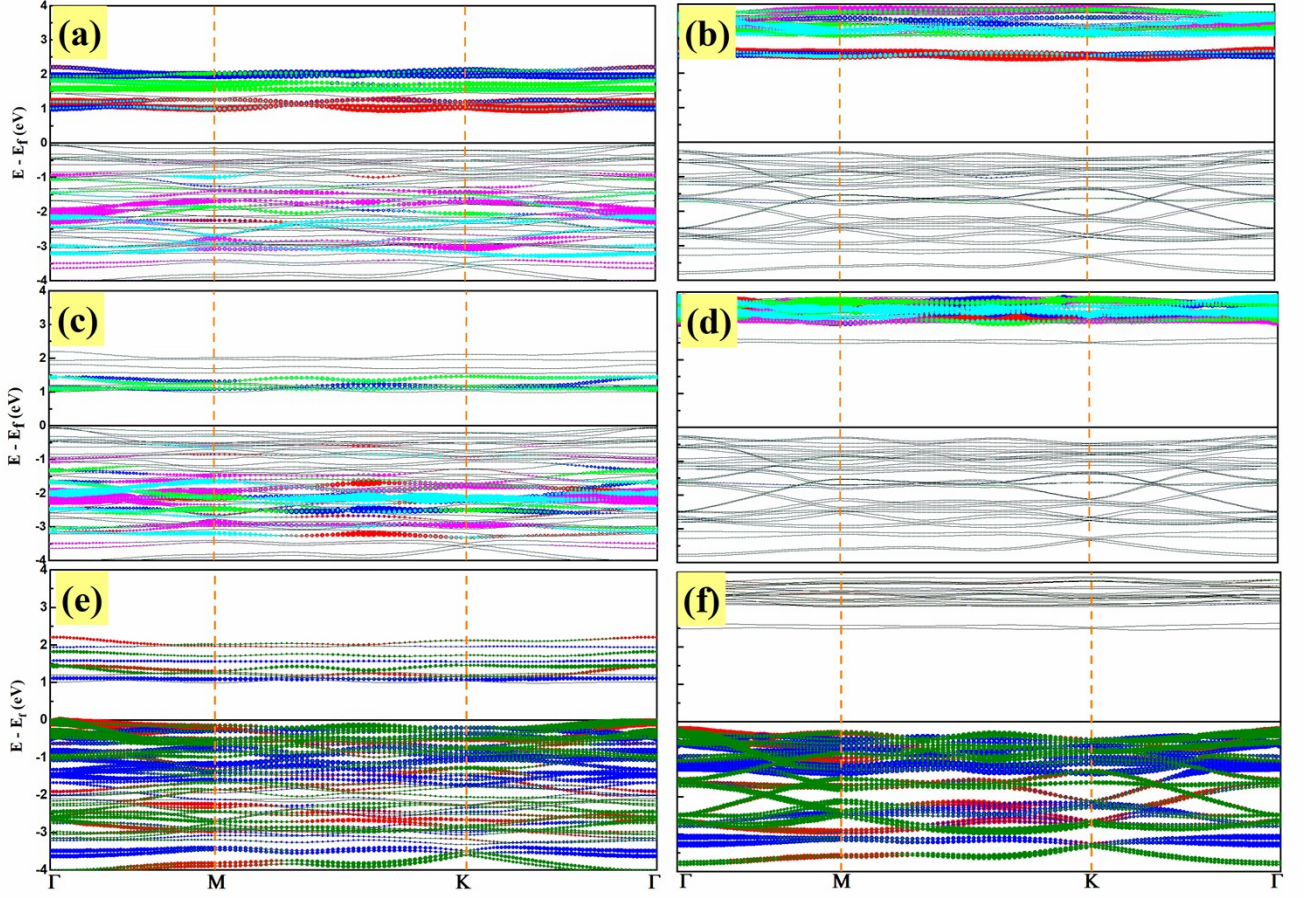

**Figure SI-2(4%T):** Projected band structures of  $\text{CrI}_3/\text{VI}_3$  heterostructure of (a-b) V, (c-d) Cr and (d-e) I atoms respectively. The first column is for majority spin while the second column shows the minority spin of the  $\text{CrI}_3/\text{VI}_3$  heterostructure respectively.



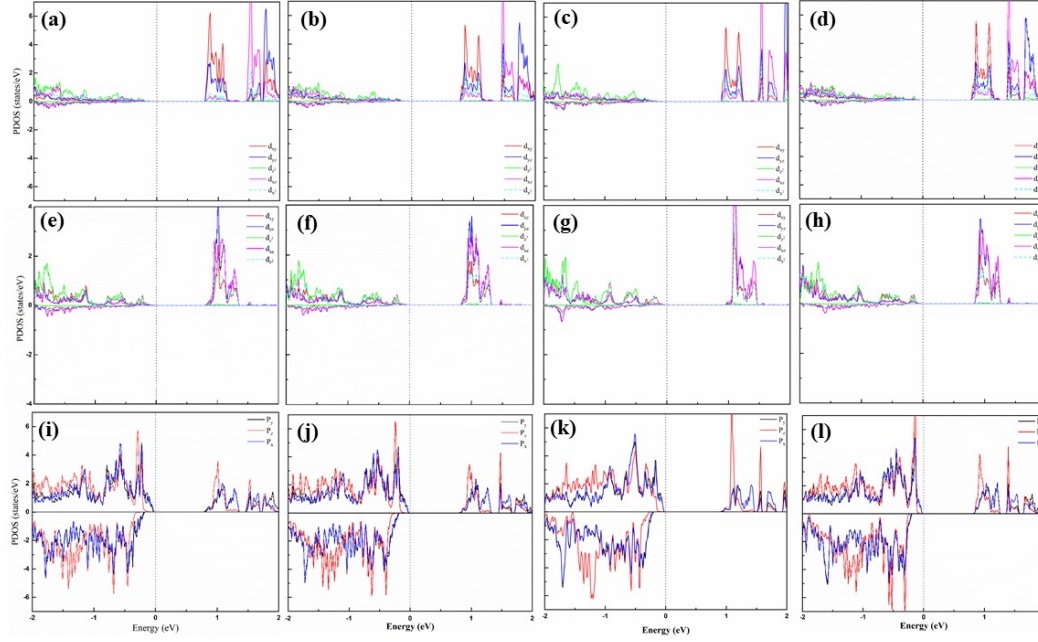

**Figure ESI-3:** Partial density of states of  $\text{VI}_3/\text{CrI}_3$  heterostructure at 1 to 4 % biaxial tensile strain. The upper, middle and lower panels are respectively for V, Cr and I atoms respectively.

The first panel is for V d-orbitals and second is for Cr d-orbitals while the third panel is for I p orbitals respectively at 1 to 4% biaxial tensile strain. Like the electronic band structure, the pdos also confirm the type-II band alignment with a semiconductor nature. The PDOS is consistent with the DOS and band structure as given in the main manuscript.

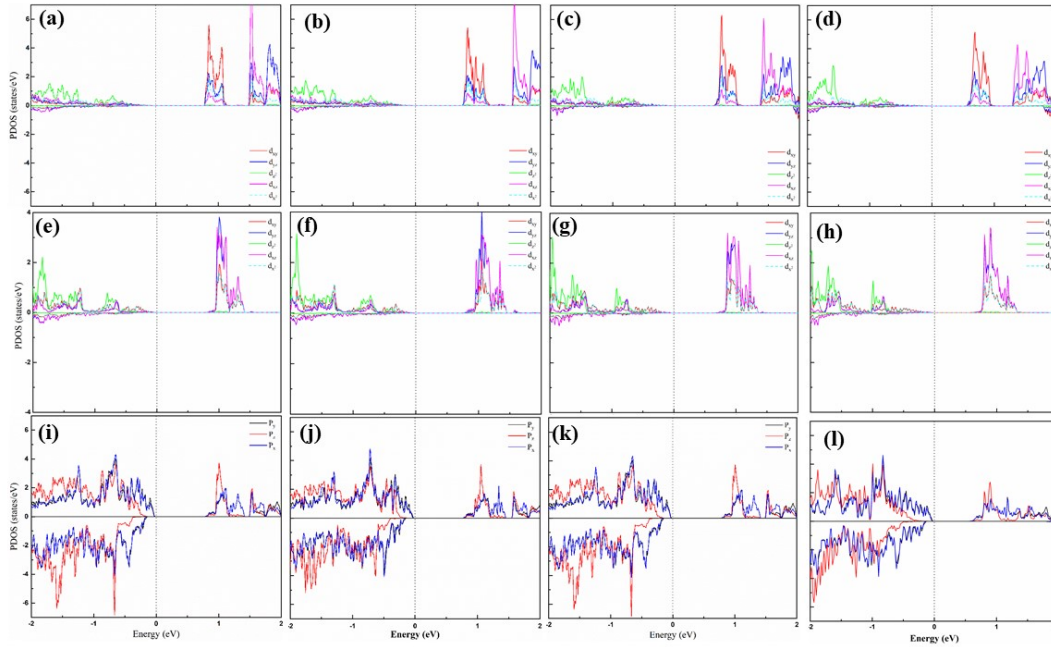

**Figure ESI-4:** Partial density of states of  $\text{VI}_3/\text{CrI}_3$  heterostructure at 1 to 4 % biaxial compressive strain. The upper, middle and lower panels are respectively for V, Cr and I atoms respectively.

The first panel is for V d-orbitals and second is for Cr d-orbitals while the third panel is for I p orbitals respectively at 1 to 4% biaxial compressive strain. Similar to the electronic band structure, the pdos also confirm the type-II band alignment with a semiconductor nature. The PDOS is consistent with the DOS and band structure as given in the main manuscript.

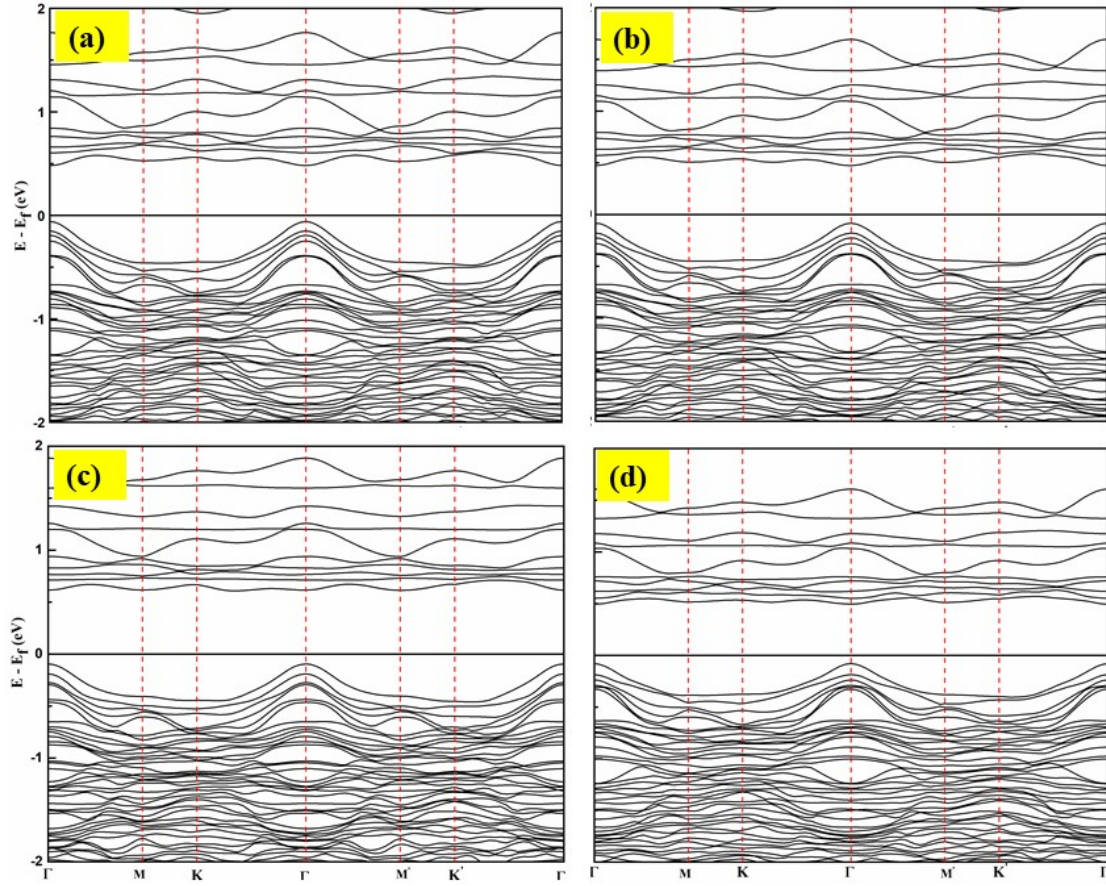

**Figure SI-3:** Electronic band structures of  $\text{CrI}_3/\text{VI}_3$  heterostructure from 1 to 4% (a-d) biaxial tensile strain respectively using GGA+U with spin orbit interaction (SOC).

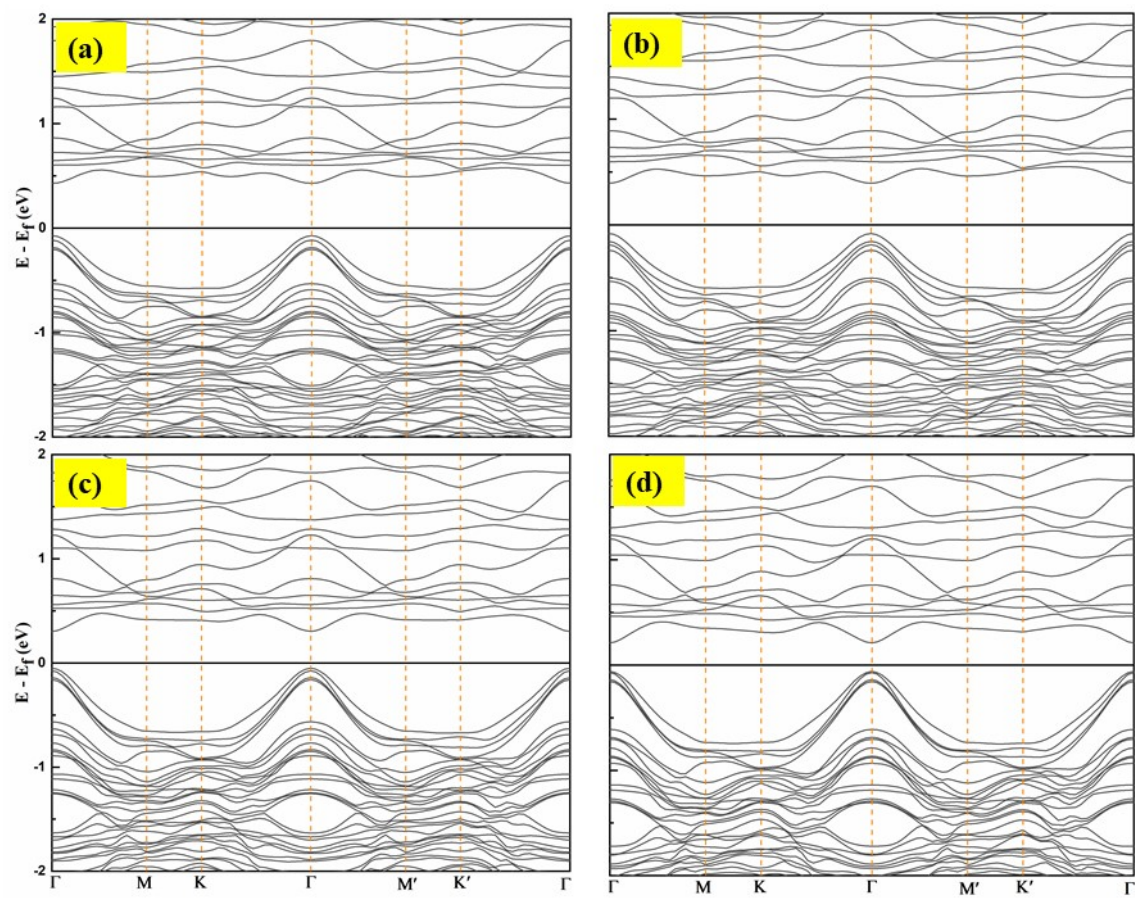

**Figure SI-4:** Electronic band structures of  $\text{CrI}_3/\text{VI}_3$  heterostructure of 1 to 4% (a-d) biaxial compressive strain respectively using GGA+U with spin orbit interaction (SOC).
